# Supplementary material for: Elicitor-Induced VOC Emission by Grapevine Leaves: Characterisation in the Vineyard
Source: MDPI journal article supplement (doi:10.3390/molecules27186028), 2022-09-15
Supplement: s1 [file s1]

# Supplementary Materials

## Elicitor-Induced VOC Emission by Grapevine Leaves: Characterisation in the Vineyard

Christelle Lemaitre-Guillier <sup>1,\*</sup>, Agnès Chartier <sup>2</sup>, Christelle Dufresne <sup>2</sup>, Antonin Douillet <sup>3</sup>, Stéphanie Cluzet <sup>4</sup>, Josep Valls <sup>4</sup>, Nicolas Aveline <sup>3</sup>, Xavier Daire <sup>1</sup> and Marielle Adrian <sup>1</sup>

\* Correspondence: christelle.guillier@inrae.fr

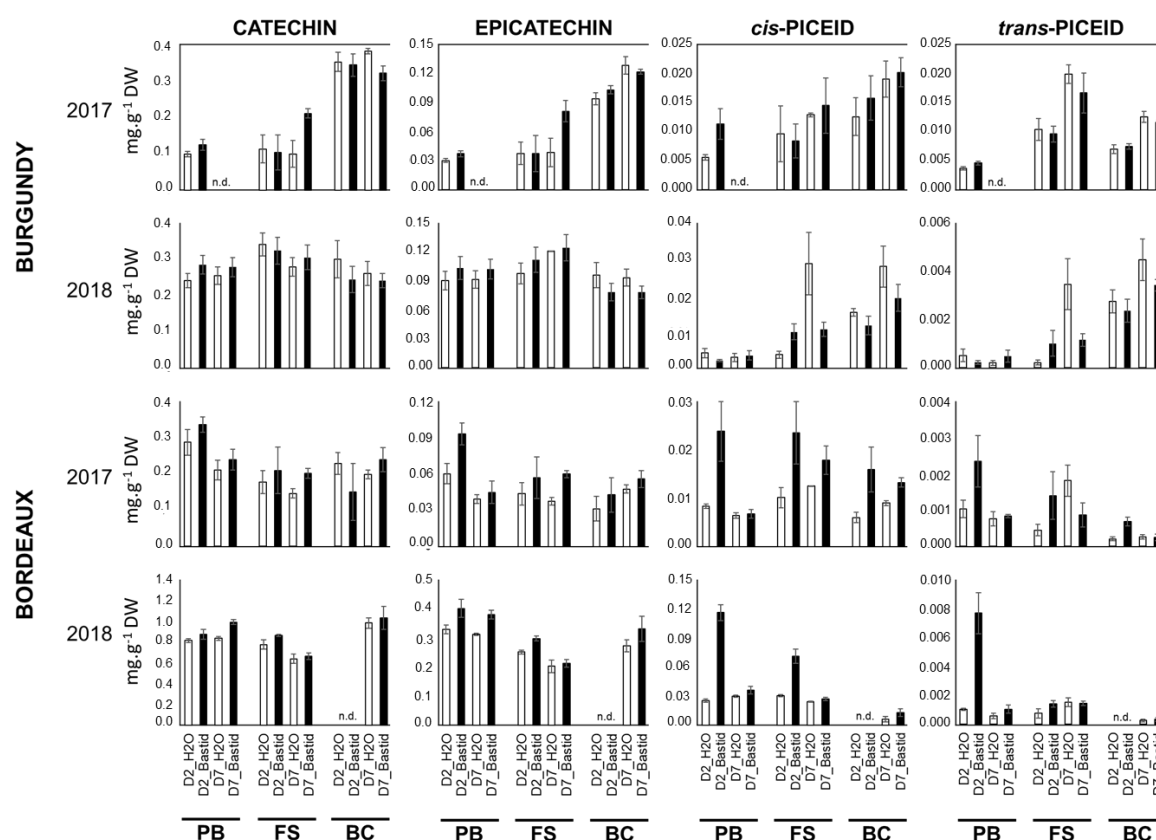

**Figure S1. Quantification of phenolics in grapevine leaves treated by Bastid®.** Experiments were performed in Burgundy (cv Chardonnay) and Bordeaux (cv Cabernet franc) vineyards along 3 phenological stages in 2017 and 2018. Treatments: H<sub>2</sub>O as control (white), Bastid® (black). Catechin, epicatechin, *cis*- and *trans*-piceids were identified and quantified by LC-MS analysis. Amounts are averaged from 3 replicates and adjusted to the dry weight (DW) of green leaf powder. Phenological stages: Pre-blossom: PB, Fruit-set: FS and Bunch-closure: BC. D2 and D7: samples collected at 2 and 7 days post-treatment, respectively. n.d.: not determined.

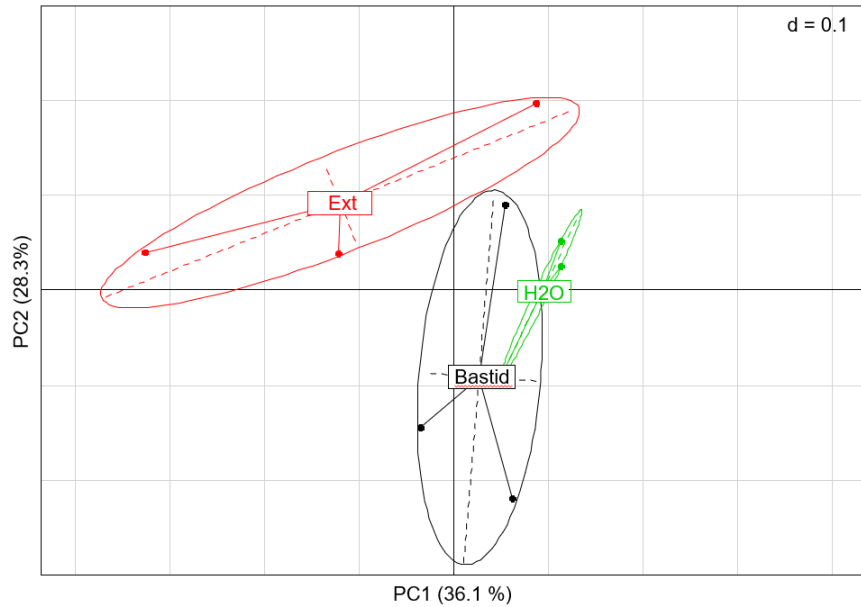

**Figure S2. Representative PCA illustration of VOC profile discrimination between foliage and plot edge areas.** Figure was built from 3 time points of VOCs collection in growing season 2018, at Fruit-set (FS) phenological stage, in Burgundy.

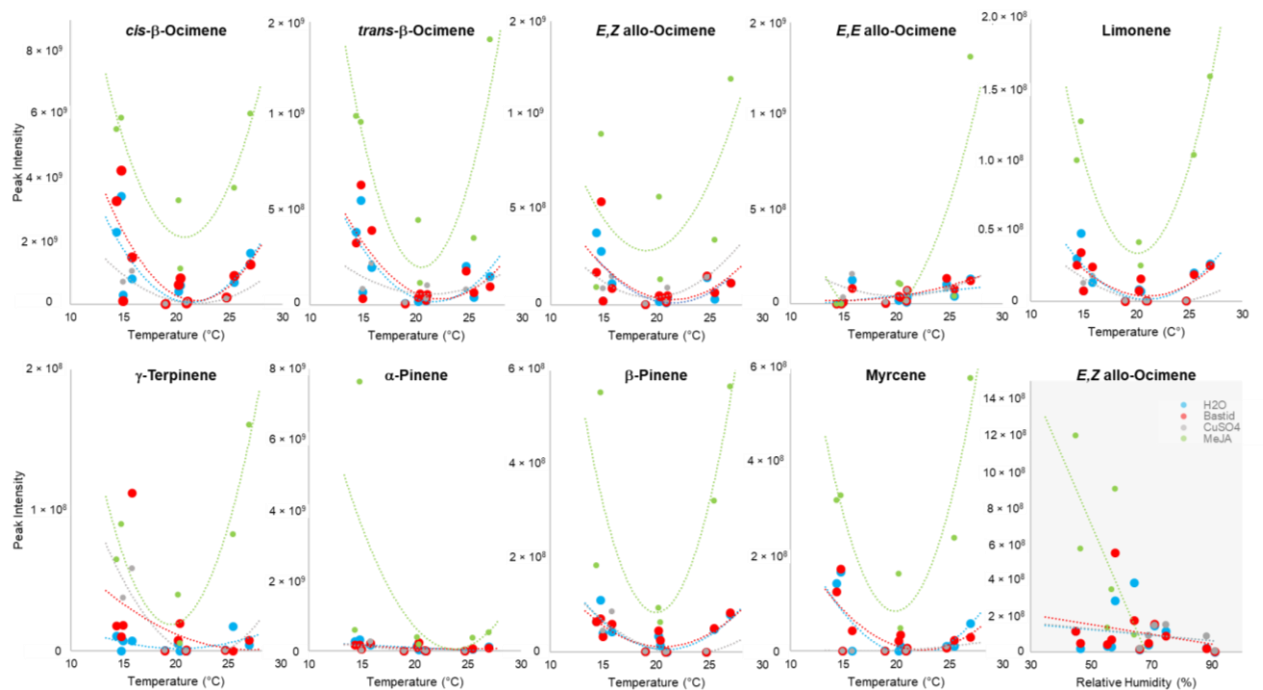

**Figure S3. Impact of mean temperature and relative humidity on elicitor-induced monoterpene detection.** Graphs were built from 2019 data. Grapevine emission of monoterpenes analysed at 3 and 5 days post-treatment with H<sub>2</sub>O (as control) or elicitor (Bastid®, MeJA CuSO<sub>4</sub>) at three phenological stages (Pre-blossom, Fruit-set, Bunch-closure) in Burgundy (cv. Chardonnay) and Bordeaux (cv. Cabernet franc) vineyards. Values correspond to VOC peak intensities and tendency curve shapes were chosen as the most fitting to the point values. Relative humidity graphs are represented with grey background.

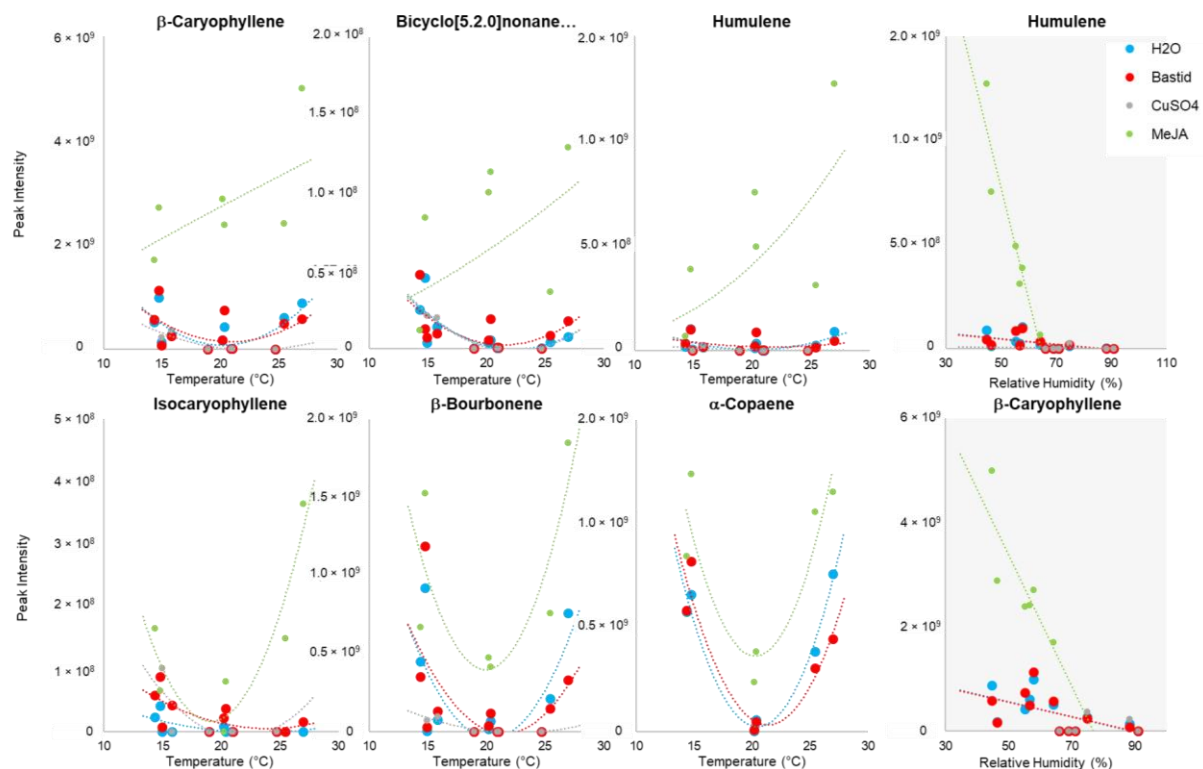

**Figure S4. Impact of mean temperature and relative humidity on elicitor-induced sesquiterpene detection.** Graphs were built from 2019 data. Grapevine emission of sesquiterpenes analysed at 3 and 5 days post-treatment with H<sub>2</sub>O (as control) or elicitor (Bastid®, MeJA CuSO<sub>4</sub>) at three phenological stages (Pre-blossom, Fruit-set, Bunch-closure) in Burgundy (cv. Chardonnay) and Bordeaux (cv. Cabernet franc) vineyards. Values correspond to VOC peak intensities and tendency curve shapes were chosen as the most fitting to the point values. Relative humidity graphs are represented with grey background.

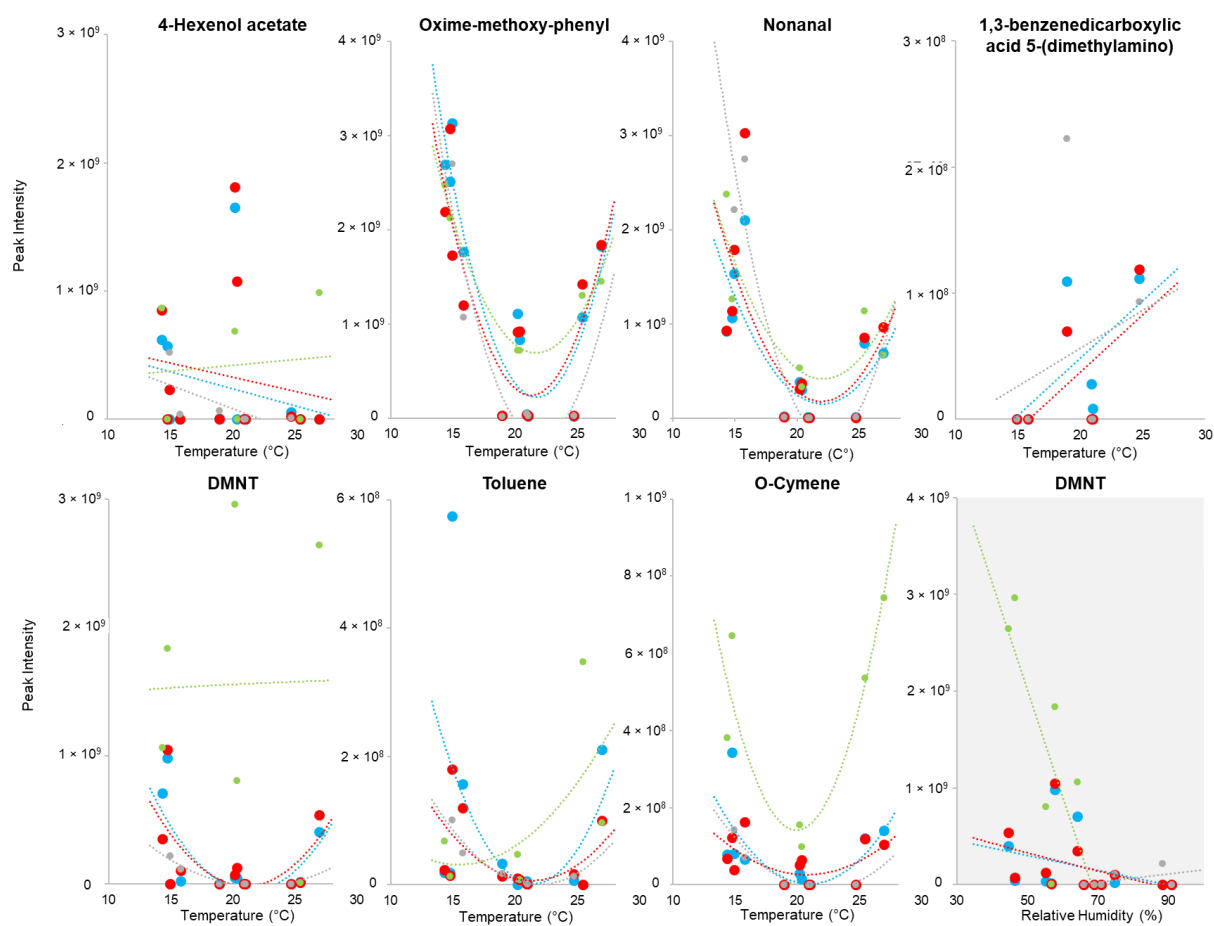

**Figure S5: Impact of mean temperature and relative humidity on “Other VOCs” detections.** Graphs were built from 2019 data. Grapevine emission of “Other VOCs” analysed at 3 and 5 days post treatment with H<sub>2</sub>O (as control) or elicitor (Bastid®, MeJA CuSO<sub>4</sub>) at three phenological stages (Pre-blossom, Fruit-set, Bunch-closure) in Burgundy (cv. Chardonnay) and Bordeaux (cv. Cabernet franc) vineyards. Values correspond to VOC peak intensities and tendency curve shapes were chosen as the most fitting to the point values. Relative humidity graphs are represented with grey background.

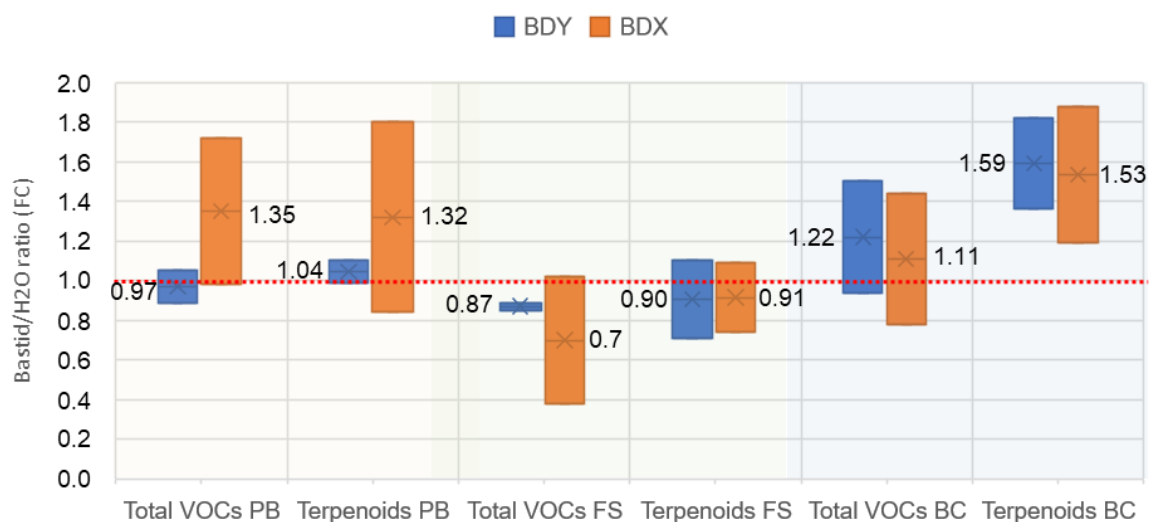

**Figure S6. Averaged Bastid *vs.* H<sub>2</sub>O fold changes throughout the 2019 growing season in Burgundy (BDY) and Bordeaux (BDX) vineyards.** Each VOCs relative quantity of VOCs was averaged from replicate sample intensities at the two time points of collection per phenological stage of grapevine (pre-blossom: PB, fruit-set: FS and bunch-closure: BC) after Bastid® or H<sub>2</sub>O treatment. Fold changes (FC) were calculated from the ratios of the Bastid®/H<sub>2</sub>O sums of overall VOCs (Total VOCs) or terpenoids intensities.

**Table S1. Number of samples analysed for stilbene quantifications over 3 years (2017 to 2019) on Burgundy and Bordeaux vineyards.**

| Year            | 2017                               | 2018                               | 2019                                                       |
|-----------------|------------------------------------|------------------------------------|------------------------------------------------------------|
| <b>Burgundy</b> | <b>48</b>                          | <b>46</b>                          | <b>60</b>                                                  |
|                 | Bastid (24), H <sub>2</sub> O (24) | Bastid (24), H <sub>2</sub> O (22) | Bastid (24), H <sub>2</sub> O (24), MeJA (12)              |
| <b>Bordeaux</b> | <b>48</b>                          | <b>48</b>                          | <b>72</b>                                                  |
|                 | Bastid (24), H <sub>2</sub> O (24) | Bastid (24), H <sub>2</sub> O (24) | Bastid (24), H <sub>2</sub> O (24), CuSO <sub>4</sub> (24) |

**Table S2. List and details of samples collected along the 3 years experiments in Burgundy (cv Chardonnay) and Bordeaux (cv Cabernet franc) vineyards, respectively.** VOCs were collected either under Open-air (OA), open air cumulated (OA-CUMUL) or bagged (BAG) modes with indicated exposure durations of collection. Samples of VOC were collected at Pre-blossom (PB), Fruit-set (FS) and Bunch-closure (BC) stages at several time-points from D0 (D2, D3, D5, D7) in 2017 and 2019 or since D0 for 3, 5 and 7 days (3D, 5D and 7D) in 2018. Total number of samples analysed by GC-MS per season are indicated in bold characters (GC-MS samples) and total number of samples per conditions are detailed in brackets.

| Year                                    |                     | 2017                                            | 2018                                            |                                    | 2019                                                                   |
|-----------------------------------------|---------------------|-------------------------------------------------|-------------------------------------------------|------------------------------------|------------------------------------------------------------------------|
| Collection mode                         |                     | OA                                              | OA_CUMUL                                        | BAG                                | BAG                                                                    |
| Exposure duration                       |                     | 24 hours                                        | 3, 5 and 7 days                                 | 4 hours                            | 4 hours                                                                |
| <b>Burgundy</b><br>(cv. Chardonnay)     | Time-points         | FS: D3 D5 D7<br>BC: D2 D4                       | FS: 3D 5D 7D<br>BC: 3D 5D 7D                    | FS: D3<br>BC: D3                   | PB: D3 D5<br>FS: D3 D5<br>BC: D3 D5                                    |
|                                         | Conditions          | Bastid (40), H <sub>2</sub> O (40),<br>Ext (14) | Bastid (23), H <sub>2</sub> O (24),<br>Ext (17) | Bastid (8), H <sub>2</sub> O (8)   | Bastid (45), MeJA (23),<br>H <sub>2</sub> O (45)                       |
|                                         | Total GC-MS samples | <b>94</b>                                       | <b>64</b>                                       | <b>16</b>                          | <b>113</b>                                                             |
|                                         |                     |                                                 |                                                 |                                    |                                                                        |
| <b>Bordeaux</b><br>(cv. Cabernet franc) | Time-points         | FS: D3 D5 D7<br>BC: D3 D5 D7                    | PB: 3D 5D 7D<br>FS: 3D 5D 7D<br>BC: 3D 6D 7D    | PB: D3<br>FS: D3<br>BC: D3         | PB: D3 D5<br>FS: D3 D5<br>BC: D3 D4                                    |
|                                         | Conditions          | Bastid (48), H <sub>2</sub> O (48),<br>Ext (10) | Bastid (35), H <sub>2</sub> O (34),<br>Ext (4)  | Bastid (12), H <sub>2</sub> O (11) | Bastid (46), H <sub>2</sub> O (48),<br>CuSO <sub>4</sub> (47), Ext (4) |
|                                         | Total GC-MS samples | <b>106</b>                                      | <b>73</b>                                       | <b>23</b>                          | <b>145</b>                                                             |
|                                         |                     |                                                 |                                                 |                                    |                                                                        |

**Table S3.** List of VOC standards used in GCMS analysis.

| <b>Compound Name</b>                                 | <b>CAS#</b> | <b>Purchase reference #</b> |
|------------------------------------------------------|-------------|-----------------------------|
| $\alpha$ -Pinene                                     | 80-56-8     | 147524                      |
| Camphene                                             | 79-92-5     | C301                        |
| $\alpha$ -Sabinene                                   | 3387-41-5   | W530597                     |
| b-Pinene                                             | 127-91-3    | 112089                      |
| Myrcene                                              | 123-35-3    | M100005                     |
| 3-Hexen-1-ol, acetate, (Z)-                          | 3681-71-8   | W317101                     |
| $\alpha$ -Phellandrene                               | 99-83-2     | W285611                     |
| 3-Carene                                             | 13466-78-9  | 115576                      |
| R(+)-Limonene                                        | 5989-27-5   | 183164                      |
| b-Ocimene (isomers mixture, <i>E,Z</i> )             | 13877-91-3  | W353901                     |
| $\alpha$ -Terpinene                                  | 99-86-5     | 223182                      |
| $\gamma$ -Terpinene                                  | 99-85-4     | 223190                      |
| $\alpha$ -Terpinolene                                | 586-62-9    | 86485                       |
| Linalool                                             | 78-70-6     | L2602                       |
| <i>cis</i> -allo-Ocimene                             | 673-84-7    | 289698                      |
| Methyl salicylate                                    | 119-36-8    | M6752                       |
| Longicyclene                                         | 1137-12-8   | 62633                       |
| b-Caryophyllene                                      | 87-44-5     | 22075                       |
| Humulene/ $\alpha$ -Caryophyllene                    | 6753-98-6   | 53675                       |
| Valencene                                            | 4630-07-3   | W344303                     |
| ( <i>Z,E</i> ) $\alpha$ -Farnesene (isomers mixture) | 502-61-4    | W383902                     |
| Methyl Jasmonate                                     | 39924-52-2  | 392707                      |
